# Supplementary material
Source: Research Square preprint supplement (doi:10.21203/rs.3.rs-8900646/v1)
Supplement: Supplementary file 1 [file 7c92633f35db6d0d5154e319.docx]

# Supplementary Appendix S1. *Full* Semi-structured Interview Guides for Key Stakeholders

**Interview Implementation Period:** October 2025

****Research Group Name****: Research Group on County-Level Medical Consortium Reform

****Research Project****: A Study on the Practice and Effect of County-Level Medical Consortium Reform (A Case Study of Yilong County)

****Research Group Members****: Li Liu, Youbin Guo, Jinliang Hu

This appendix presents the full version of semi-structured interview guides developed for four key stakeholder groups in this study. Each guide is tailored to the professional roles and core responsibilities of the target participants, and includes a standardised respondent information collection form, anonymisation and data management rules, interview opening script, core interview questions, closing prompt and research team implementation notes. All interviews were audio-recorded with explicit participant consent, anonymised for analysis, and transcribed in a timely manner after completion.

**Interview Guide 1: Policy Makers**

Applicable to: Relevant responsible personnel from the County Health Commission and Medical Insurance Bureau

****Interview Duration****: Approximately 30–40 minutes

****Core Research Focus****: Top-level design, policy logic, institutional guarantee and inter-departmental coordination of the county-level Medical Consortium reform

### Respondent Basic Information Collection Form

| **Type** | **Collection Item** | **Content Completion Column** |
| --- | --- | --- |
| Mandatory Core Items | Anonymised ID | (*e.g.*, Policy-01) |
|  | Age Group | □ 22–30 years □ 31–40 years □ 41–50 years □ 51–60 years |
|  | Type of Affiliated Institution |  |
|  | Job Title |  |
|  | Job Level |  |
|  | Total Working Years in the Healthcare Sector |  |
|  | Duration of Participation in Medical Consortium Reform-Related Work |  |
|  | Core Work Responsibilities Related to the Reform |  |
| Optional Supplementary Items | Type of Affiliated Department/Division | □ General Administration □ Medical Affairs Management □ Medical Insurance Management □ Primary Healthcare Management □ Other: ________ |
|  | Informed Consent Form Signing Status | □ Signed □ Unsigned |
|  | Interview Audio Recording ID |  |

### Anonymisation and Information Management Rules

All information, audio recordings and transcribed content collected from this interview are used solely for the academic research of this study, and will not be used for any other purposes or disclosed to any third party.

All research materials are bound to the anonymised ID of the respondent. No personally identifiable information (including your full name, full institutional name, contact details, etc.) will appear in the research process or published research outputs; only anonymised viewpoints and sample characteristics will be presented.

Original interview materials will be stored in encrypted form for three years after the completion of the study, and will be subject to irreversible and unified destruction upon expiration.

You may terminate the interview at any time during the process, without any adverse consequences or liability of any kind.

### Interview Opening Script

Hello, we are from the Research Group on County-Level Medical Consortium Reform. This interview aims to systematically understand the full-cycle practice of the county-level Medical Consortium reform in our county since 2018, with a focus on the design and implementation of the county-township medical institution linkage and the integration of village doctors into the Medical Consortium system.

The interview will take approximately 30 to 40 minutes. We will audio-record the entire interview, and all content will only be used for academic research. We will anonymise all information and strictly protect your personal data. You may terminate the interview at any time without any adverse consequences. If you agree to participate, we will first ask you to sign the informed consent form before starting the interview. Do you agree to participate?

### Core Interview Questions

What was the core background and policy motivation for launching the county-level Medical Consortium reform in Yilong County in 2018? What were the most prominent structural predicaments and practical pain points of the primary healthcare system in the county at the initial stage of the reform, and what core reform objectives and strategic priorities were formulated accordingly?

From 2018 to 2024, what key developmental stages has the county-level Medical Consortium reform in Yilong County experienced? Please elaborate on the core tasks, landmark policy adjustments and institutional innovations in each stage, as well as the critical driving factors for the phase transition.

What is the core rationale for the simultaneous promotion of county-township medical linkage and village doctor embedding in the reform design? In comparison with the Medical Consortium reform models in other regions, what are the differentiated institutional designs and adaptive adjustments of Yilong County targeting the resource constraints and structural characteristics of underdeveloped areas?

In your perspective, what is the internal logical connection between the vertically integrated county-township professional network and the community-embedded village doctor service network? What institutional arrangements have been adopted in the top-level design to ensure the synergistic operation and organic integration of the two networks?

What core supporting policies have been formulated to advance the effective implementation of county-township linkage and village doctor embedding? What breakthrough adjustments have been made in the key dimensions of personnel management, financial investment, medical insurance payment and performance assessment?

What are the most prominent institutional barriers and practical challenges in the continuous advancement of the dual-network integration reform? In combination with the resource endowment of underdeveloped areas, what targeted optimisation strategies and policy improvements are needed for the next stage of reform?

Do you consider the dual-network integration model of Yilong County to have replicable and promotable value for other underdeveloped counties with similar primary healthcare development conditions? What are the core prerequisites and institutional guarantees for the cross-regional replication of this model?

### Closing Prompt

Is there any content related to the practice of the county-level Medical Consortium reform that we have not mentioned but is of critical importance to this study? Thank you again for your valuable time and sharing.

### Interview Implementation Notes (For Research Team Use Only)

Confirm the core area of responsibility of the respondent before the interview, and adjust the order and focus of the questions in the modules accordingly.

Pay close attention to the special considerations and differentiated practices in policy design mentioned by the respondent, and follow up on details in a timely manner.

Complete the audio transcription of the interview in a timely manner after completion, and file it uniformly with this interview guide and the information collection form.

**Interview Guide 2: Medical Consortium Managers**

Applicable to: Leaders of the general hospital of the county-level Medical Consortium, directors of township health centres

****Interview Duration****: Approximately 30–40 minutes

****Core Research Focus****: Reform operation and implementation, collaborative management mechanism, practical effects and on-site challenges of the county-level Medical Consortium

Respondent Basic Information Collection Form

| **Type** | **Collection Item** | **Content Completion Column** |
| --- | --- | --- |
| Mandatory Core Items | Anonymised ID | (*e.g.*, Management-01) |
|  | Age Group | □ 22–30 years □ 31–40 years □ 41–50 years □ 51–60 years |
|  | Type of Affiliated Institution | □ General Hospital of the Medical Consortium □ Township Health Centre |
|  | Job Title |  |
|  | Job Level |  |
|  | Total Working Years in the Healthcare Sector |  |
|  | Duration of Participation in Medical Consortium Reform-Related Work |  |
|  | Core Work Responsibilities Related to the Reform |  |
| Optional Supplementary Items | Area of Supervised Work | □ Clinical Services □ General Administration □ Human Resources and Finance □ Grassroots Support □ Medical Insurance Operation □ Other: ________ |
|  | Informed Consent Form Signing Status | □ Signed □ Unsigned |
|  | Interview Audio Recording ID |  |

### Anonymisation and Information Management Rules

All information, audio recordings and transcribed content collected from this interview are used solely for the academic research of this study, and will not be used for any other purposes or disclosed to any third party.

All research materials are bound to the anonymised ID of the respondent. No personally identifiable information (including your full name, full institutional name, contact details, etc.) will appear in the research process or published research outputs; only anonymised viewpoints and sample characteristics will be presented.

Original interview materials will be stored in encrypted form for three years after the completion of the study, and will be subject to irreversible and unified destruction upon expiration.

You may terminate the interview at any time during the process, without any adverse consequences or liability of any kind.

### Interview Opening Script

Hello, we are from the Research Group on County-Level Medical Consortium Reform. This interview aims to systematically understand the implementation and on-site operation of the county-level Medical Consortium reform in our county, with a focus on the county-township medical linkage and the integration of village doctors into the Medical Consortium system.

The interview will take approximately 30 to 40 minutes. We will audio-record the entire interview, and all content will only be used for academic research. We will anonymise all information and strictly protect your personal data. You may terminate the interview at any time without any adverse consequences. If you agree to participate, we will first ask you to sign the informed consent form before starting the interview. Do you agree to participate?

### Core Interview Questions

Since the launch of the Medical Consortium reform in 2018, what fundamental changes have taken place in the core positioning, main responsibilities and operational mode of your institution in the county-township medical linkage and village doctor integration system? How has the institutional role of your institution changed in the integrated county-township-village healthcare service system?

What long-term and stable operational mechanisms has your institution established to promote the effective implementation of county-township medical linkage? Please elaborate on the standardised implementation processes and practical operation effects of key links such as expert sinking, paired assistance, telemedicine and two-way referral.

What specific institutional measures have been adopted to integrate village clinics into the unified management and service system of the county-level Medical Consortium? What regular and systematic work has been carried out for the capacity improvement, standardised diagnosis and treatment, and performance assessment of village doctors?

In the process of promoting resource sinking and grassroots capacity building, how does your institution balance the development needs of the institution itself and the service improvement of grassroots medical and health institutions? What indicators have been set in the performance assessment system to guide and evaluate the grassroots support work of the institution?

From the perspective of institutional operation, what are the most significant changes in the service capacity, patient flow and operational efficiency of the Medical Consortium before and after the reform? What core mechanisms of county-township linkage and village doctor embedding have driven these changes?

What are the most prominent practical difficulties and institutional constraints faced by your institution in promoting the dual-network integration reform? Such as human resource allocation, financial support, resource coordination and grassroots service capacity. What targeted policy support and institutional guarantees are needed from the county-level government and relevant departments?

In your practical experience, what is the most successful institutional design or operational mechanism in the dual-network integration reform? What core enlightenment can it provide for the deepening of Medical Consortium reform in underdeveloped areas?

### Closing Prompt

Is there any content related to the implementation of the county-level Medical Consortium reform that we have not mentioned but is of critical importance to this study? Thank you again for your valuable time and sharing.

### Interview Implementation Notes (For Research Team Use Only)

For leaders of the general hospital, focus on follow-up questions about the county-wide operational mechanism, resource pooling and cross-institutional coordination; for directors of township health centres, focus on the on-site implementation in the jurisdiction, the practical experience of connecting upper and lower levels, and the grassroots service capacity.

For specific mechanisms and typical cases mentioned by the respondent, follow up on details and practical effects in a timely manner.

Complete the audio transcription of the interview in a timely manner after completion, and file it uniformly with this interview guide and the information collection form.

**Interview Guide 3: Frontline Medical Staff**

Applicable to: Frontline doctors and nurses in county and township medical institutions, licensed village doctors in administrative village clinics

****Interview Duration****: Approximately 25 minutes (county/township clinicians) | Approximately 20 minutes (village doctors)

****Core Research Focus****: Frontline practical experience, work mode changes, service capacity building and actual demands of the reform

### Subguide 3.1: Clinicians in County and Township Medical Institutions

#### Respondent Basic Information Collection Form

| **Type** | **Collection Item** | **Content Completion Column** |
| --- | --- | --- |
| Mandatory Core Items | Anonymised ID | (*e.g.*, Clinical-01) |
|  | Age Group | □ 22–30 years □ 31–40 years □ 41–50 years □ 51–60 years |
|  | Type of Affiliated Institution | □ General Hospital of the Medical Consortium □ Township Health Centre |
|  | Job Title |  |
|  | Job Level |  |
|  | Total Working Years in the Healthcare Sector |  |
|  | Duration of Participation in Medical Consortium Reform-Related Work |  |
|  | Core Work Responsibilities Related to the Reform |  |
| Optional Supplementary Items | Type of Practising Qualification | □ Medical Practitioner □ Assistant Medical Practitioner □ Registered Nurse □ Other: ________ |
|  | Type of Affiliated Department | □ Clinical Department □ Public Health Department □ Medical Technology Department □ Other: ________ |
|  | Informed Consent Form Signing Status | □ Signed □ Unsigned |
|  | Interview Audio Recording ID |  |

#### Anonymisation and Information Management Rules

All information, audio recordings and transcribed content collected from this interview are used solely for the academic research of this study, and will not be used for any other purposes or disclosed to any third party.

All research materials are bound to the anonymised ID of the respondent. No personally identifiable information (including your full name, full institutional name, contact details, etc.) will appear in the research process or published research outputs; only anonymised viewpoints and sample characteristics will be presented.

Original interview materials will be stored in encrypted form for three years after the completion of the study, and will be subject to irreversible and unified destruction upon expiration.

You may terminate the interview at any time during the process, without any adverse consequences or liability of any kind.

#### Interview Opening Script

Hello, we are from the Research Group on County-Level Medical Consortium Reform. This interview aims to understand the actual changes brought by the Medical Consortium reform to the daily work of frontline clinical staff.

The interview will take approximately 25 minutes. We will audio-record the entire interview, and all content will only be used for academic research. We will anonymise all information and strictly protect your personal data. You may terminate the interview at any time without any adverse consequences. If you agree to participate, we will first ask you to sign the informed consent form before starting the interview. Do you agree to participate?

#### Core Interview Questions

What were the main contents of your daily work and the main challenges you faced in clinical practice before the launch of the Medical Consortium reform in 2018? Such as medical resource allocation, professional capacity development, and patient service management.

From 2018 to 2024, with the advancement of the Medical Consortium reform, what are the most obvious changes in your work content, service mode, professional training and performance assessment?

What practical effects have the county-township linkage mechanisms such as expert sinking, telemedicine, and two-way referral brought to your daily clinical work? What are the existing problems and unreasonable aspects in the specific implementation process?

In the process of participating in grassroots support work (such as sinking to township health centres/village clinics for diagnosis and treatment, technical guidance), what are your practical experiences and difficulties? How has this work affected your professional capacity development and daily work arrangement?

What changes have you observed in the medical-seeking behaviour and treatment choices of patients before and after the reform? What factors do you think have led to these changes, and how do they reflect the implementation effect of the Medical Consortium reform?

From the perspective of frontline clinical staff, what are the biggest highlights and the most prominent problems of the current dual-network integration reform? What targeted improvement suggestions do you have for the existing problems?

#### Closing Prompt

Is there any content related to the impact of the Medical Consortium reform on frontline clinical work that we have not mentioned but is of critical importance to this study? Thank you again for your valuable time and sharing.

#### Interview Implementation Notes (For Research Team Use Only)

Use language that fits the communication habits of frontline medical staff, and avoid overly obscure academic terms.

Focus on the respondent's real work experience and actual demands, and follow up on specific cases in a timely manner.

Complete the audio transcription of the interview in a timely manner after completion, and file it uniformly with this interview guide and the information collection form.

### Subguide 3.2: Village Doctors

#### Respondent Basic Information Collection Form

| **Type** | **Collection Item** | **Content Completion Column** |
| --- | --- | --- |
| Mandatory Core Items | Anonymised ID | (*e.g.*, Village Doctor-01) |
|  | Age Group | □ 22–30 years □ 31–40 years □ 41–50 years □ 51–60 years |
|  | Type of Affiliated Institution | Village Clinic |
|  | Job Title | Licensed Village Doctor |
|  | Total Working Years in the Healthcare Sector |  |
|  | Duration of Participation in Medical Consortium Reform-Related Work |  |
|  | Core Work Responsibilities |  |
| Optional Supplementary Items | Type of Service Village | □ Suburban Village □ Remote Mountain Village □ Central Village □ Other: ________ |
|  | Size of Service Population |  |
|  | Informed Consent Form Signing Status | □ Signed □ Unsigned |
|  | Interview Audio Recording ID |  |

#### Anonymisation and Information Management Rules

All information, audio recordings and transcribed content collected from this interview are used solely for the academic research of this study, and will not be used for any other purposes or disclosed to any third party.

All research materials are bound to the anonymised ID of the respondent. No personally identifiable information (including your full name, specific village name, contact details, etc.) will appear in the research process or published research outputs; only anonymised viewpoints and sample characteristics will be presented.

Original interview materials will be stored in encrypted form for three years after the completion of the study, and will be subject to irreversible and unified destruction upon expiration.

You may terminate the interview at any time during the process, without any adverse consequences or liability of any kind.

#### Interview Opening Script

Hello, we are from the Research Group on County-Level Medical Consortium Reform. This interview aims to understand the actual changes brought by the Medical Consortium reform to the daily work of village doctors.

The interview will take approximately 20 minutes. We will audio-record the entire interview, and all content will only be used for academic research. We will anonymise all information and strictly protect your personal data. You may terminate the interview at any time without any adverse consequences. If you agree to participate, we will first ask you to sign the informed consent form before starting the interview. Do you agree to participate?

#### Core Interview Questions

What were the main contents of your daily work, income composition and main operational difficulties of the village clinic before the Medical Consortium reform in 2018?

After being integrated into the unified management system of the county-level Medical Consortium through the "hired by township, deployed in village" mechanism, what are the most obvious changes in your work content, service mode, income level and professional identity?

What specific support and assistance have you received from the county general hospital and township health centres since the reform? Such as technical training, telemedicine support, drug supply guarantee and public health service guidance. Which of these supports have the most practical effects on your daily work?

What changes have taken place in the way of seeking medical advice and the trust in village clinics among the villagers in your service area after the reform? How has the volume of diagnosis and treatment and public health services of the village clinic changed accordingly?

When encountering difficult and complicated diseases that cannot be diagnosed and treated at the village level, what channels and processes do you use to seek support from the upper-level medical institutions through the Medical Consortium? Compared with before the reform, what are the changes in the efficiency and effect of this referral and consultation process?

What are the three most prominent practical difficulties you are currently facing in your daily work? Such as professional capacity improvement, equipment and drug allocation, income guarantee and work pressure. What more targeted support and institutional guarantees do you hope the Medical Consortium and relevant departments can provide for village doctors?

What changes have taken place in your understanding of the professional role and career development of village doctors after the reform? What are your expectations for the future development of village clinics and the professional growth of village doctors?

#### Closing Prompt

Is there any content related to the impact of the Medical Consortium reform on village doctors' work that we have not mentioned but is of critical importance to this study? Thank you again for your valuable time and sharing.

#### Interview Implementation Notes (For Research Team Use Only)

Use colloquial and plain language in the interview, avoid professional academic terms, and fit the communication habits of village doctors.

Focus on the respondent's real work experience and actual demands, and follow up on specific cases in a timely manner.

Complete the audio transcription of the interview in a timely manner after completion, and file it uniformly with this interview guide and the information collection form.

**Interview Guide 4: Technical Support Personnel**

Applicable to: Operation and maintenance personnel, data management personnel of the county-level smart medical health platform

****Interview Duration****: Approximately 25 minutes

****Core Research Focus****: Construction and iteration of the smart medical platform, technical empowerment effect, grassroots application obstacles and optimisation direction

### Respondent Basic Information Collection Form

|  | **Collection Item** | **Content Completion Column** |
| --- | --- | --- |
| Mandatory Core Items | Anonymised ID | (*e.g.*, Technical-01) |
|  | Age Group | □ 22–30 years □ 31–40 years □ 41–50 years □ 51–60 years |
|  | Type of Affiliated Institution |  |
|  | Job Title |  |
|  | Job Level |  |
|  | Total Working Years in the Relevant Field |  |
|  | Duration of Participation in Work Related to the Medical Consortium Platform |  |
|  | Core Work Responsibilities |  |
| Optional Supplementary Items | Core Type of Service | □ Platform Development □ Daily Operation and Maintenance □ Data Management □ Technical Training □ Other: ________ |
|  | Informed Consent Form Signing Status | □ Signed □ Unsigned |
|  | Interview Audio Recording ID |  |

### Anonymisation and Information Management Rules

All information, audio recordings and transcribed content collected from this interview are used solely for the academic research of this study, and will not be used for any other purposes or disclosed to any third party.

All research materials are bound to the anonymised ID of the respondent. No personally identifiable information (including your full name, full institutional/enterprise name, contact details, etc.) will appear in the research process or published research outputs; only anonymised viewpoints and sample characteristics will be presented.

Original interview materials will be stored in encrypted form for three years after the completion of the study, and will be subject to irreversible and unified destruction upon expiration.

You may terminate the interview at any time during the process, without any adverse consequences or liability of any kind.

### Interview Opening Script

Hello, we are from the Research Group on County-Level Medical Consortium Reform. This interview aims to understand the construction, application and on-site implementation of the smart medical health platform in our county's Medical Consortium reform, with a focus on the actual role of the platform in county-township linkage and service empowerment for village doctors.

The interview will take approximately 25 minutes. We will audio-record the entire interview, and all content will only be used for academic research. We will anonymise all information and strictly protect your personal and institutional relevant data. You may terminate the interview at any time without any adverse consequences. If you agree to participate, we will first ask you to sign the informed consent form before starting the interview. Do you agree to participate?

### Core Interview Questions

When was the smart medical health platform of Yilong County's Medical Consortium officially constructed and put into operation? From 2018 to 2024, what key iterative upgrade stages has the platform experienced? What were the core construction objectives and functional design priorities of each stage, combined with the reform needs of the Medical Consortium?

What core functional modules has the platform developed to support the vertical integration of the county-township medical linkage? How do these modules realise the information sharing, resource coordination and service synergy between county and township medical institutions, such as mutual recognition of inspection results, telemedicine and electronic health record sharing?

What targeted functional designs and technical supports have been provided for village doctors in the development of the platform? Such as smart medical assistant systems, remote diagnostic equipment connection, chronic disease management data recording and public health service information collection. How do these technical supports improve the service capacity of village doctors?

From 2018 to 2024, what changes have taken place in the coverage rate, actual utilisation rate and operation effect of the smart medical health platform in county, township and village medical institutions? Are there significant differences in the application of the platform among different levels of medical institutions?

What are the three most prominent technical difficulties and practical obstacles in the construction, promotion and grassroots application of the platform? Such as technical adaptation of grassroots medical institutions, digital literacy of frontline medical staff (especially village doctors), and data security and information interconnection.

In your perspective, what is the core value of the smart medical health platform in the dual-network integration reform of the Medical Consortium? How does it realise the technical connection and synergistic operation between the county-township professional network and the village doctor service network?

Combined with the actual needs of the deepening reform of the Medical Consortium and the grassroots medical and health services in underdeveloped areas, what functional optimisations and technical upgrades are needed for the smart medical health platform in the next stage? What targeted measures can be taken to improve the actual utilisation effect of the platform at the grassroots level?

### Closing Prompt

Is there any content related to the construction and application of the smart medical health platform for the Medical Consortium that we have not mentioned but is of critical importance to this study? Thank you again for your valuable time and sharing.

### Interview Implementation Notes (For Research Team Use Only)

Adjust the focus of the questions according to the core work direction of the respondent: for operation and maintenance personnel, focus on follow-up questions about on-site application, fault handling and grassroots training; for development personnel, focus on functional design and iteration logic.

For the core functions and typical application scenarios of the platform mentioned by the respondent, follow up on the actual on-site implementation effects in a timely manner.

Complete the audio transcription of the interview in a timely manner after completion, and file it uniformly with this interview guide and the information collection form.
